# Supplementary material
Source: Springer Nature journal article supplement (https://www.springermedizin.de/resource/supplementary/13058_2010_2537_MOESM7_ESM.pdf/9701644)
Supplement: MOESM7 [file 9701644]

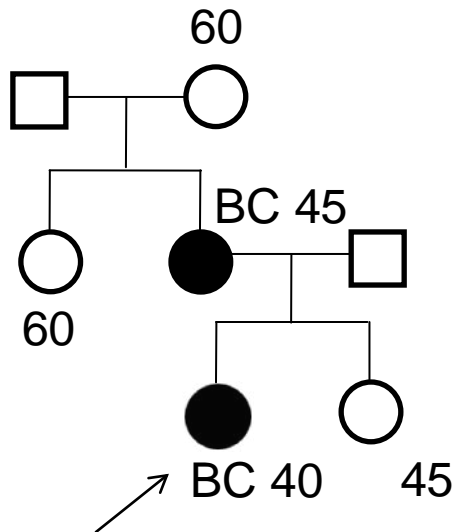

| Tumour marker status              | <i>BRCA1</i> | <i>BRCA2</i> |
|-----------------------------------|--------------|--------------|
| Unknown                           | 0.04         | 0.05         |
| ER-negative                       | 0.11         | 0.05         |
| ER-positive                       | 0.01         | 0.05         |
| Triple negative                   | 0.18         | 0.07         |
| ER-negative non-TN                | 0.03         | 0.02         |
| TN CK5/6 and CK14-positive†       | 0.47         | 0.05         |
| TN Either CK5/6 or CK14-positive† | 0.21         | 0.06         |
| TN CK-negative†                   | 0.07         | 0.07         |

\*Both mother and proband are affected and the age of diagnosis of cancer in each case is the same as the age of last follow-up. Marker status of the mother's tumour are shown.

† Both CK 5/6 and CK14 have been tested

Boxes indicate that genotype-specific risk is less than 10% when tumour marker status is unknown but higher than 10% where marker status is known.
